# Supplementary material for: Interactions between the Prophage 919TP and Its Vibrio cholerae Host: Implications of gmd Mutation for Phage Resistance, Cell Auto-Aggregation, and Motility
Source: MDPI journal article supplement (doi:10.3390/v13122342), 2021-11-23
Supplement: s1 [file s1]

**Table S1.** Bacterial strains, plasmids and bacteriophage.

| Name                        | Genotype or relevant markers                                                                                                         |
|-----------------------------|--------------------------------------------------------------------------------------------------------------------------------------|
| <i>Escherichia coli</i>     |                                                                                                                                      |
| S17-1                       | <i>thi pro hsdR hsdM<sup>+</sup> recA RP4-2-Tc::Mu-Km::Tn7 λpir</i> [8]                                                              |
| <i>Vibrio cholerae</i>      |                                                                                                                                      |
| Vc1                         | wt, <i>V. cholerae</i> O1 El Tor strain 919T [3]                                                                                     |
| Vc2                         | Δ919TP                                                                                                                               |
| Vc3                         | Vc2-919TP <i>cl<sup>-</sup></i> resistant strain                                                                                     |
| Vc4                         | Δ <i>gmd</i>                                                                                                                         |
| pDM4                        | Cm <sup>r</sup> ; suicide vector with an R6K origin ( <i>pir</i> requiring) and <i>sacBR</i> genes from <i>Bacillus subtilis</i> [8] |
| pDM4919TP                   | Cm <sup>r</sup> ; pDM4 derivative containing 919TP fused in-frame                                                                    |
| pDM4 <i>gmd</i>             | Cm <sup>r</sup> ; pDM4 derivative containing <i>gmd</i> fused in-frame                                                               |
| pDM4 <i>cl</i>              | Cm <sup>r</sup> ; pDM4 derivative containing <i>cl</i> fused in-frame                                                                |
| 919TP                       | <i>Siphoviridae</i> , isolated from Vc1 cell-free spent [3]                                                                          |
| 919TP <i>cl<sup>-</sup></i> | <i>Siphoviridae</i> , lytic variant of phage 919TP                                                                                   |
| KVP40                       | <i>Myoviridae</i> , isolated from Japan seawater [46]                                                                                |

**Table S2.** Oligonucleotides used in this study.

| Name               | Primers (5'-3')                                       |
|--------------------|-------------------------------------------------------|
| 1                  | GCTGATGATTTCCGCATGGG                                  |
| 2                  | CGGCACAGACAGTGCCCAGC                                  |
| 3                  | CGTTGAAGCCGAGAGCGGCC                                  |
| 4                  | CGGCAATCGGGCCATTTCATC                                 |
| 5                  | CCGCCATTTATGGCGACAAACCC                               |
| 6                  | GGCAGCATCGACAATCGCC                                   |
| 919TP deletion     |                                                       |
| 919TP_1            | TTTTCTAGAGGGGGGTACCACCTACCGCTCG                       |
| 919TP_2            | GATAAAGGTGGGGGTACTTTGAGAGAACCAGGGGCTATTTGGTGGTAGCC    |
| 919TP_3            | GCCCCGGTTCTCTCAAAGTACCCCACTTTATCTTTCTACTTTTTCC        |
| 919TP_4            | TTTCTCGAGCCGTACAGTCTTGCGCAGCACCG                      |
| <i>cl</i> deletion |                                                       |
| CI_1               | TTTTCTAGACAGCGCAGCCAGTGTCCGTG                         |
| CI_2               | CCCTAGCCAATTAATAATTACAGTTGTCAATTGACGATCTAATATCTG      |
| CI_3               | CGTCAATTGACAAGTGAATTTTAATTGGCTAGGGAATGAAAGATGACAGATAG |
| CI_4               | TTTCTCGAGCCGGGGATTGGCGCACCTTG                         |
| qPCR               |                                                       |
| flaC_F             | GAACGCCTCTCATCAGGTAATC                                |
| flaC_R             | CCACATCCAAACCACGAGAT                                  |
| flaD_F             | CGGTACATTCGCAACCAAATC                                 |
| flaD_R             | TACCTCCCATCAAAGCGTTATC                                |
| hfq_F              | CTGCAAGGTCAGATCGAATCA                                 |
| hfq_R              | AGCAGGAACCACAGTAGAAATC                                |

**Table S3.** Comparative analysis of SNPs and Indels identified in the phage 919TP *cI*-resistant mutants.

| Chromosome | Position | Reference | Alteration | Effect             | Impact    | Gene              |
|------------|----------|-----------|------------|--------------------|-----------|-------------------|
| Vc1        | 32686    | T         | TC         | frameshift_variant | HIGH      | trkG              |
| Vc1        | 100233   | G         | GC         | frameshift_variant | HIGH      | cc4               |
| Vc1        | 184278   | A         | AG         | frameshift_variant | HIGH      | epsM_1            |
| Vc1        | 197643   | C         | CG         | frameshift_variant | HIGH      | recG_2            |
| Vc1        | 378854   | T         | TC         | intergenic_region  | MODIFIER  | ptsO              |
| Vc1        | 394742   | G         | GC         | intergenic_region  | MODIFIER  | pyrB-argF         |
| Vc1        | 433416   | A         | AC         | frameshift_variant | HIGH      | serA              |
| Vc1        | 437308   | C         | CG         | intergenic_region  | MODIFIER  | ubiH              |
| Vc1        | 499117   | T         | TC         | intergenic_region  | MODIFIER  | ampD-fldA_1       |
| Vc1        | 585770   | T         | TG         | frameshift_variant | HIGH      | nupX_1            |
| Vc1        | 588667   | C         | CG         | intergenic_region  | MODIFIER  | deoA-deoB         |
| Vc1        | 652122   | A         | AG         | intergenic_region  | MODIFIER  | dinB-PROKKA_00619 |
| Vc1        | 688760   | C         | CG         | intergenic_region  | MODIFIER  | skp-lpxD          |
| Vc1        | 823453   | T         | TG         | frameshift_variant | HIGH      | dapE_1            |
| Vc1        | 914073   | T         | TC         | intergenic_region  | MODIFIER  | cheW_1-ccmA       |
| Vc1        | 914658   | A         | AG         | frameshift_variant | HIGH      | ccmA              |
| Vc1        | 963867   | A         | AG         | frameshift_variant | HIGH      | PROKKA_00944      |
| Vc1        | 1069599  | T         | TG         | frameshift_variant | HIGH      | PROKKA_01040      |
| Vc1        | 1122494  | A         | AG         | intergenic_region  | MODIFIER  | PROKKA_01080      |
| Vc1        | 1270500  | T         | TG         | frameshift_variant | HIGH      | PROKKA_01218      |
| Vc1        | 1538441  | GAATAATTC | G          | intergenic_region  | MODIFIER  | fabA              |
| Vc1        | 1538561  | C         | CA         | intergenic_region  | MODIFIER  | fabA              |
| Vc1        | 1538601  | C         | CA         | intergenic_region  | MODIFIER  | fabA              |
| Vc1        | 1538606  | C         | CG         | intergenic_region  | MODIFIER  | fabA              |
| Vc1        | 1538613  | AC        | A          | intergenic_region  | MODIFIER  | fabA              |
| Vc1        | 1809152  | A         | AG         | intergenic_region  | MODIFIER  | setA-btr_1        |
| Vc1        | 1838595  | G         | GC         | frameshift_variant | HIGH      | cdd_1             |
| Vc1        | 1909685  | GC        | G          | frameshift_variant | HIGH      | PROKKA_01781      |
| Vc1        | 2185569  | A         | AC         | intergenic_region  | MODIFIER  | pleD_3-ygdH_1     |
| Vc1        | 2185636  | T         | TC         | intergenic_region  | MODIFIER  | pleD_3-ygdH_1     |
| Vc1        | 2185967  | T         | TC         | frameshift_variant | HIGH      | ygdH_1            |
| Vc1        | 2190123  | A         | AC         | frameshift_variant | HIGH      | thiI_1            |
| Vc1        | 2196162  | C         | CG         | frameshift_variant | HIGH      | dxs_1             |
| Vc1        | 2229096  | C         | CA         | intergenic_region  | MODIFIER  | pasT-smpB         |
| Vc1        | 2230323  | G         | GC         | intergenic_region  | MODIFIER  | smpB-intA_3       |
| Vc1        | 2231421  | G         | GC         | frameshift_variant | HIGH      | inta_3            |
| Vc1        | 2234249  | T         | TC         | frameshift_variant | HIGH      | PROKKA_02091      |
| Vc1        | 2467731  | T         | TC         | frameshift_variant | HIGH      | greA_1            |
| Vc1        | 2475046  | C         | CG         | frameshift_variant | HIGH      | cnrA_2            |
| Vc1        | 2482039  | A         | AC         | frameshift_variant | HIGH      | rsmC_1            |
| Vc1        | 2515704  | C         | CG         | frameshift_variant | HIGH      | hrpB_2            |
| Vc1        | 2519088  | T         | TC         | frameshift_variant | HIGH      | PROKKA_02337      |
| Vc1        | 2579580  | T         | TC         | intergenic_region  | MODIFIER  | rpoS-nlpD         |
| Vc1        | 2651682  | G         | GC         | frameshift_variant | HIGH      | pilT_1            |
| Vc1        | 2879370  | A         | AG         | intergenic_region  | MODIFIER  | ybdG              |
| Vc1        | 2889666  | T         | TC         | frameshift_variant | HIGH      | PROKKA_02709      |
| Vc1        | 2899167  | CG        | C          | frameshift_variant | HIGH      | gmd               |
| Vc1        | 2900286  | C         | A          | missense_variant   | MODERATE  | algC              |
| Vc1        | 2932819  | T         | TC         | intergenic_region  | MODIFIER  | murP              |
| Vc1        | 2934409  | G         | GC         | frameshift_variant | HIGH      | murQ_2            |
| Vc1        | 3019058  | G         | GC         | intergenic_region  | MODIFIER  | atpH-atpF         |
| Vc1        | 26506    | T         | TG         | frameshift_variant | HIGH      | cheR_2            |
| Vc1        | 54635    | A         | AG         | intergenic_region  | MODIFIER  | Irp_4-calB        |
| Vc1        | 64530    | T         | TG         | intergenic_region  | MODIFIER  | pctB_6            |
| Vc1        | 72744    | G         | GC         | intergenic_region  | MODIFIER  | yceM              |
| Vc1        | 95420    | T         | TC         | intergenic_region  | MODIFIER  | glgX-lamB         |
| Vc1        | 98486    | T         | TG         | frameshift_variant | HIGH,HIGH | PROKKA_02930      |
| Vc1        | 106432   | T         | TC         | intergenic_region  | MODIFIER  | alkA-ogt_2        |
| Vc1        | 500776   | G         | T          | missense_variant   | MODERATE  | PROKKA_03298      |
| Vc1        | 816823   | GGCGAAGAT | C          | frameshift_variant | HIGH      | ulaC              |
| Vc1        | 980739   | T         | TC         | frameshift_variant | HIGH      | PROKKA_03777      |

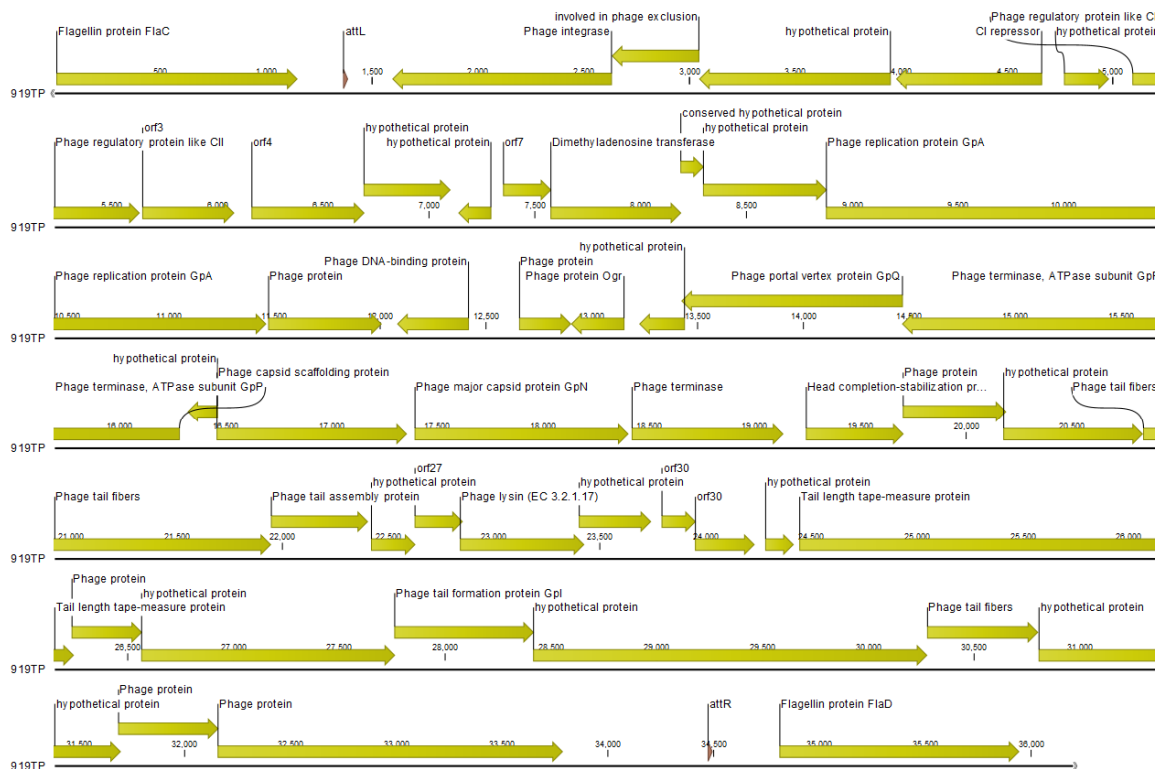

**Figure S1.** Genomic structure of prophage genome 919TP. The genome map was performed using the CLC Main Workbench, version 12.0 (CLC bio, Qiagen, Denmark). Arrows represent predicted ORFs, the direction of the arrow represents the direction of transcription.

## References

3. Shen, X.; Zhang, J.; Xu, J.; Du, P.; Pang, B.; Li, J.; Kan, B.J.F.i.m. The resistance of *Vibrio cholerae* O1 El Tor strains to the typing phage 919TP, a member of K139 phage family. **2016**, *7*, 726.
8. Milton, D.L.; O'Toole, R.; Horstedt, P.; Wolf-Watz, H.J.J.o.b. Flagellin A is essential for the virulence of *Vibrio anguillarum*. **1996**, *178*, 1310-1319.
46. Matsuzaki, S.; Tanaka, S.; Koga, T.; Kawata, T.J.M.; immunology. A broad - host - range vibriophage, KVP40, isolated from sea water. **1992**, *36*, 93-97.
